# Supplementary material
Source: HighWire-hosted journal article supplement (http://asnr-client.stage.highwire.org/highwire/filestream/182345/field_highwire_adjunct_files/0/16-00835.pdf)
Supplement: 16-00835.pdf [file 16-00835.pdf]

**On-line Table 1: Stent retrievers used**

| Device                | Used in No. of Patients |
|-----------------------|-------------------------|
| Solitaire FR          | 255                     |
| ERIC <sup>a</sup>     | 79                      |
| pREset                | 30                      |
| Capture <sup>b</sup>  | 24                      |
| EmboTrap <sup>c</sup> | 18                      |
| Other                 | 13                      |

<sup>a</sup> The ERIC device was used as a secondary or tertiary “rescue” device in 20 patients.

<sup>b</sup> MindFrame, Irvine, California.

<sup>c</sup> Neuravi, Galway, Ireland.

**On-line Table 2: Baseline characteristics of excluded patients without follow-up referred from a foreign stroke center<sup>a</sup>**

| Variables                          | n = 28                     |
|------------------------------------|----------------------------|
| Age (mean) (yr)                    | 65.3 ± 11.0; range, 39–81  |
| Sex (male)                         | 17 (61%)                   |
| Diabetes                           | 4 (14%)                    |
| Hyperlipidemia                     | 7 (25%)                    |
| Hypertension                       | 16 (57%)                   |
| Known atrial fibrillation          | 8 (29%)                    |
| Prior stroke                       | 4 (14%)                    |
| CCI 0                              | 13 (46%)                   |
| CCI 1–3                            | 12 (43%)                   |
| CCI 4–10                           | 3 (11%)                    |
| IV rtPA                            | 20 (71%)                   |
| Clot location                      |                            |
| ICA-T                              | 5 (18%)                    |
| M1                                 | 18 (64%)                   |
| M2                                 | 4 (14%)                    |
| Other                              | 1 (4%)                     |
| NIHSS (mean)                       | 16.3 ± 4.1; range, 8–25    |
| Extracranial carotid stenting      | 2 (7%)                     |
| Onset to image (min)               | NA <sup>b</sup>            |
| Image to groin (min)               | NA <sup>b</sup>            |
| Onset to TICI (min)                | 338 ± 76.7; range, 162–482 |
| General anesthesia                 | 18 (64%)                   |
| Treated primarily with ERIC device | 5 (18%)                    |

**Note:**—CCI indicates Charlson comorbidity index.

<sup>a</sup> Data are No. (%) unless otherwise indicated.

<sup>b</sup> Time of initial diagnostic imaging was unknown for a large proportion of patients.

**On-line Table 3: Procedural adverse events**

| ERIC (n = 57)                               | Non-ERIC (n = 57)                   |
|---------------------------------------------|-------------------------------------|
| Failed thrombectomy ×2                      | Failed thrombectomy ×3              |
| Puncture of femoral vein ×1                 | Stent retriever detachment ×2       |
| Carotid/central embolus/stent thrombosis ×4 | Carotid stent thrombosis/embolus ×4 |
| Stent retriever embolus ×1                  | Stent retriever embolus ×5          |
| Procedural hemorrhage ×6                    | Procedural hemorrhage ×2            |
| ICA dissection ×1                           | ICA dissection ×1                   |
| Femoral embolus ×1                          |                                     |
| Any subarachnoid hemorrhage ×9              | Any subarachnoid hemorrhage ×9      |

**On-line Table 4: Multivariate analyses**

| Covariates                                               | P Value |
|----------------------------------------------------------|---------|
| Covariates associated with favorable recanalization      |         |
| ERIC device                                              | .94     |
| NIHSS                                                    | .04     |
| Interventionalist                                        | .03     |
| Covariates associated with favorable clinical outcome    |         |
| ERIC device                                              | .92     |
| Onset to TICI                                            | <.0001  |
| Age                                                      | .0001   |
| NIHSS                                                    | <.0001  |
| CCI >1                                                   | .01     |
| Covariates associated with procedural duration           |         |
| ERIC device                                              | .008    |
| Interventionalist                                        | <.0001  |
| NIHSS                                                    | .0002   |
| Extracranial stenting                                    | .0001   |
| Covariates associated with number of thrombectomy passes |         |
| ERIC device                                              | .38     |
| Clot location                                            | .006    |
| Covariates associated with need for several devices      |         |
| ERIC device                                              | .01     |
| Interventionalist                                        | .003    |
| Clot location                                            | .008    |
| NIHSS                                                    | .02     |
| Covariates associated with symptomatic hemorrhages       |         |
| ERIC device                                              | .36     |
| Onset to TICI                                            | .02     |
| Covariates associated with procedural adverse events     |         |
| ERIC device                                              | .96     |
| Interventionalist                                        | .03     |
| NIHSS                                                    | .04     |
